# Supplementary material for: The Role of Extracellular Polymeric Substances in the Toxicity Response of Anaerobic Granule Sludge to Different Metal Oxide Nanoparticles
Source: MDPI journal article supplement (doi:10.3390/ijerph19095371), 2022-04-28
Supplement: s1 [file s1]

# Supplementary Information

## S1. Materials and methods

### *S1.1 Synthetic Wastewater*

To benefit the growth of the microbes in the AGS, glucose was selected as carbon source because it is easy to degrade. The synthetic medium composition contained glucose (7000 mg/L), nutrients (500 mg/L  $\text{NH}_4\text{Cl}$ , 26 mg/L  $\text{K}_2\text{HPO}_4 \cdot 3\text{H}_2\text{O}$ , 0.25 g/L yeast extract, and 0.25 g/L tryptone), and trace elements based on the Vanderbilt mineral medium[1] except sulfate to avoid precipitation of Cu or Zn sulfides. The carbonate buffer (5.6 g/L  $\text{NaHCO}_3$ , 0.05 g/L  $\text{CaCl}_2 \cdot 2\text{H}_2\text{O}$ , and 0.2 g/L  $\text{MgCl}_2 \cdot 6\text{H}_2\text{O}$ ) was also adopted to maintain the pH of the synthetic wastewater in a stable and controlled culture

### *S1.2 Pre-incubation of Methanogenic activity bioassays*

The 1.08× concentrated medium (37 mL) which was the same as in the parent anaerobic reactor without glucose were added to each bottle under gas mixture  $\text{N}_2/\text{CO}_2$  (80:20, v/v) atmosphere. After sieved through 70-mesh sieve to remove fine particles, the AGS withdrawn from the parent reactor t inoculated into the serum bottles to a final concentration of 1000 mgVSS/L. Either sodium acetate (1000 mgCOD/L) or  $\text{H}_2$  gas were used as substrate.  $\text{H}_2$  was supplied at an initial concentration of 0.5 atm of  $\text{H}_2/\text{CO}_2$  (80:20, v/v) overpressure. Subsequently, all the assays were pre-incubated overnight avoid a lag phase caused by the atmospheric oxygen exposure.

### S1.3 EPS extraction

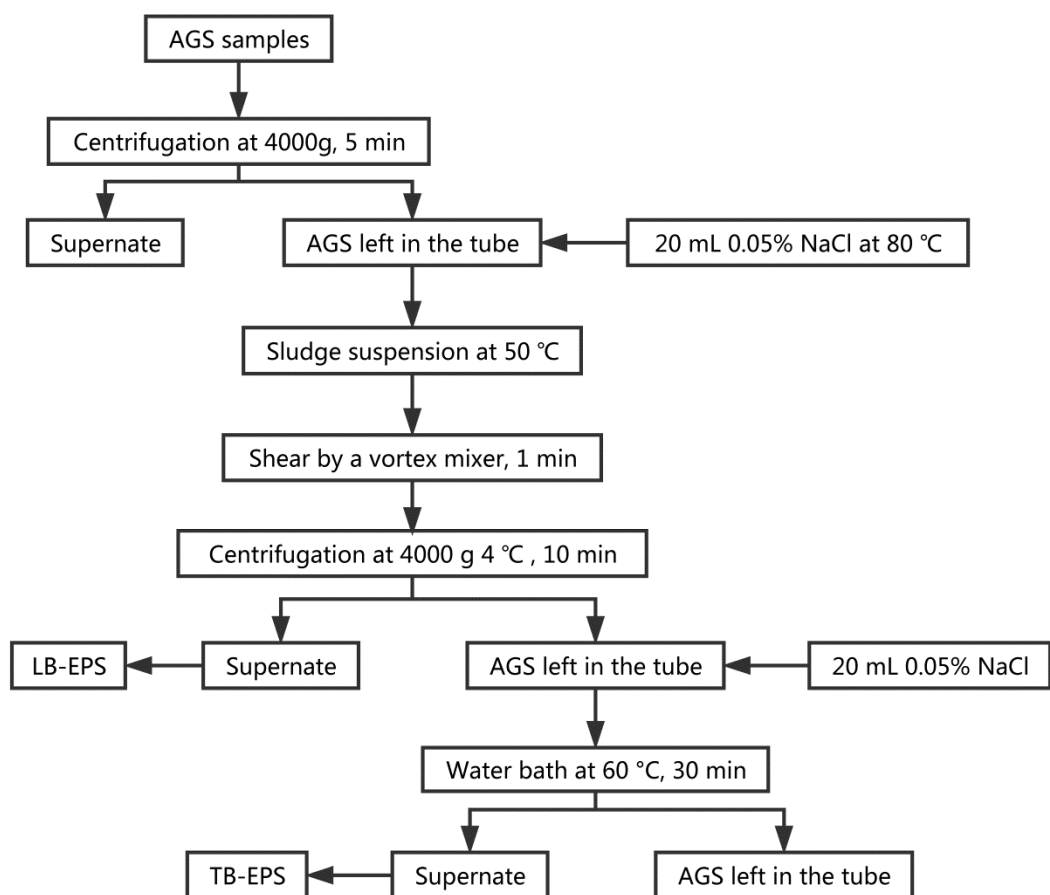

**Figure S1.** Methods for the extraction of AGS EPS.

#### S1.4 Fluorescence in situ hybridization (FISH)

The FISH analysis were performed following a modified protocol of Gomec, et al. [2], and carried out in three steps: fixation, hybridization and identification, as shown in **Figure S2**.

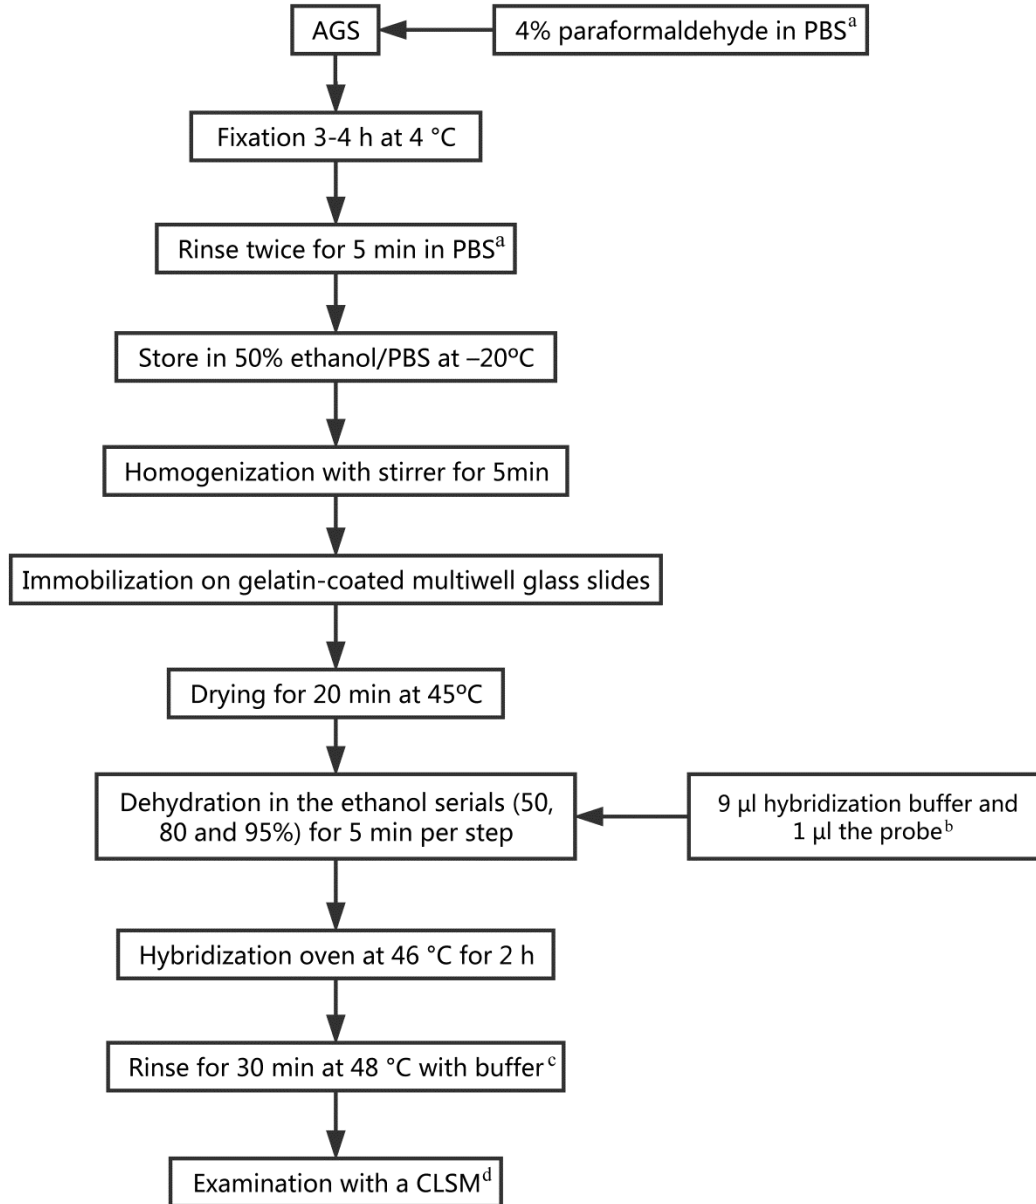

**Figure S2.** The protocol of FISH analysis. a The PBS components (pH 7.2): 0.13 M NaCl, 7mM Na<sub>2</sub>HPO<sub>4</sub>, 3 mM Na<sub>2</sub>H<sub>2</sub>PO<sub>4</sub>. b The hybridization buffer components: 0.9 M NaCl, 20 mM Tris-HCl (pH 7.2), 0.01% SDS + 35% (ARC915) or 5% (EUB338) formamid; 5 ng/mL of the final probe concentration. c The buffer containing the same components as the hybridization buffer except for the probes. d Confocal laser scanning microscope (CLSM, FV10i, Olympus, Japan).

#### *S1.4 Reactive oxygen species (ROS) production and lactate dehydrogenase (LDH) release*

The production of intracellular ROS in AGS was by the DCF assay according to the reference [3]. Briefly, the AGS samples were first rinsed with 0.85% (w/w) NaCl solution three times. The pellets were then re-suspended in NaCl solution and incubated with 20  $\mu$ M H<sub>2</sub>DCF-DA (Molecular Probes, Invitrogen, USA) at 35  $\pm$  1 °C in darkness for 30 min. The harvested AGS by centrifugation was re-suspended in NaCl solution, and then plated in a 96-well plate (Molecular Devices, USA). Finally, the generated fluorescein DCF was measured by microplate reader (Synergy H1, Biotek, Vermont, USA) at excitation/emission wavelengths of 485/520 nm.

LDH was determined by using an LDH Assay Kit (Dojindo, Kumamoto, Japan) in accordance with the manufacturer's instructions: after the batch experiments, the supernatant was separated from the AGS by centrifugation at 12,000 g for 5 min and then transferred to mix with the working solution provided by the kit. After incubation at 37 °C for 30 min under dark condition, stop solution was added and the absorbance of mixture was measured at wavelength of 490 nm using a microplate reader (Synergy H1, Biotek, Vermont, USA).

Each of the above experiment was carried out in triplicate. ROS and LDH values of the treated groups were expressed as the percentage of control groups that were assumed to be 100%.

### S1.5 NPs Fluorescent Labeling

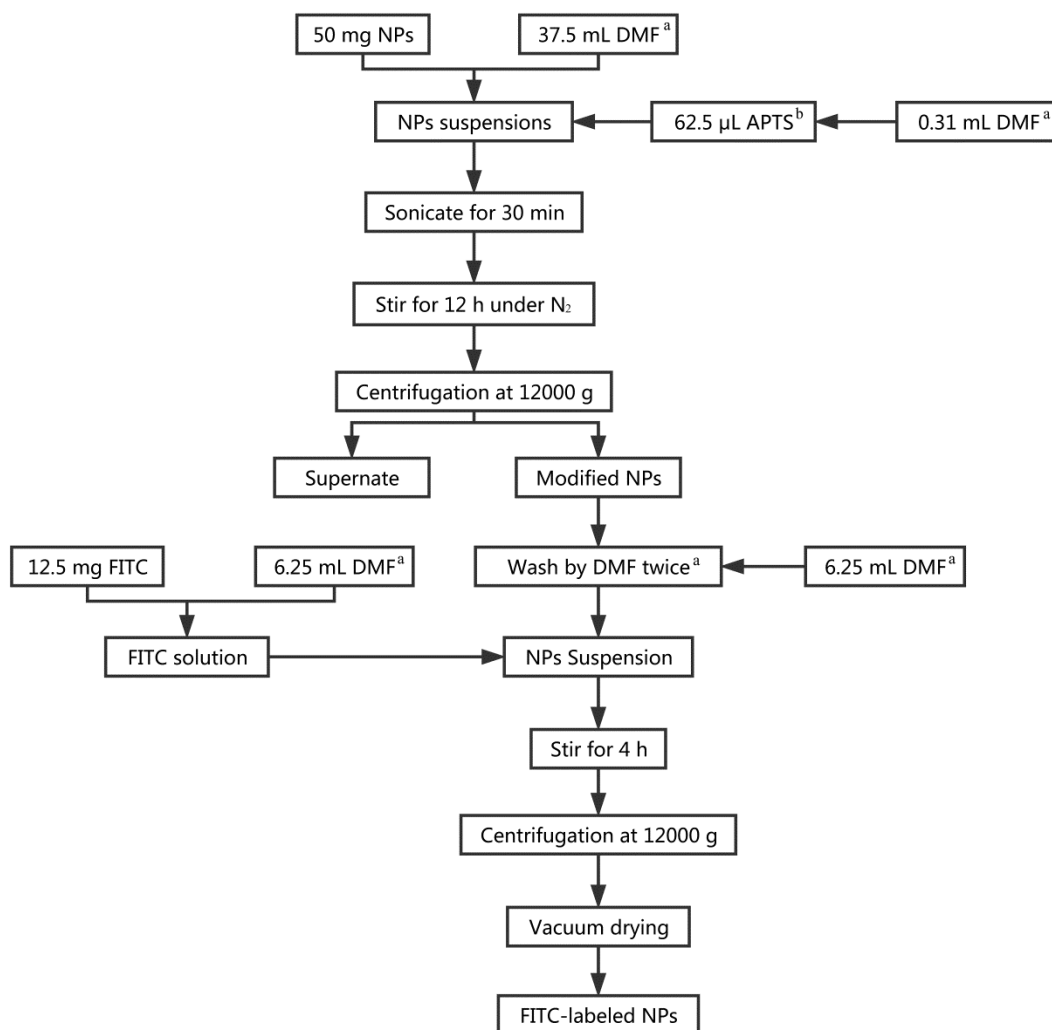

**Figure S3.** Procedures of NPs fluorescence labeling. (<sup>a</sup> DMF, anhydrous dimethylformamide. <sup>b</sup> APTS, aminopropyl triethoxy silane).

### S1.6 Pretreatment of the AGS for SEM observation

The AGS samples were fixed overnight in 2.5% vol/vol glutaraldehyde (pH 7.2–7.4) at 4 °C, and then washed 3 times with 0.1M phosphate buffer solution for 15 min each. Subsequently, the specimens were dehydrated in a series of ethanol serials (25%–100%). After replacement by a mixture of isoamyl acetate and ethanol (volume ratio 1:1) and then pure isoamyl acetate for 15 min each, the pellets were dried with a critical-point drier and coated with platinum for SEM observations.

## S2. Supplemental figures

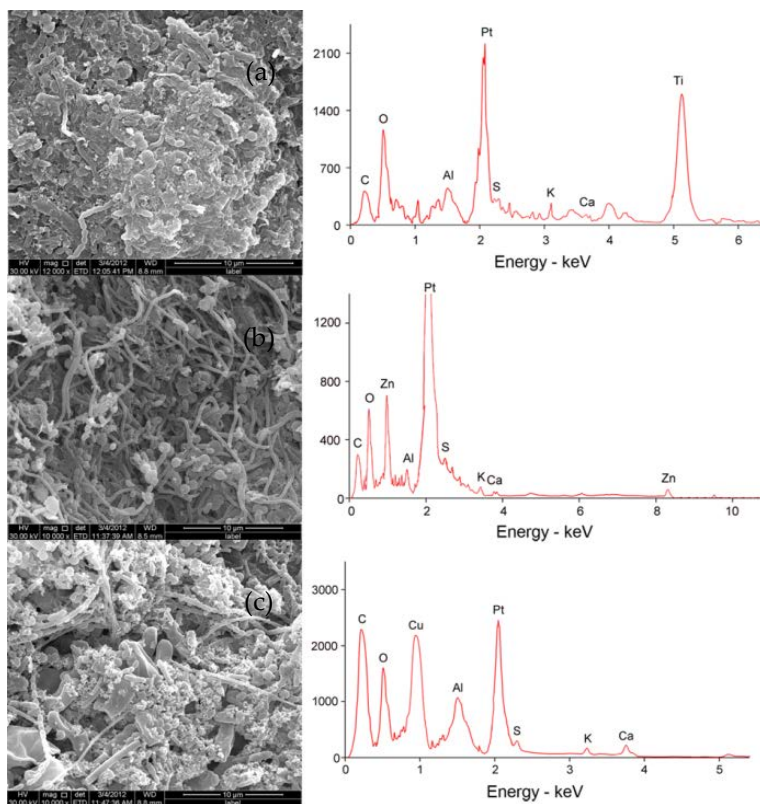

**Figure S4.** Typical SEM images and EDX analysis of AGS after TiO<sub>2</sub> NPs (a), ZnO NPs (b) and CuO NPs (c) exposure (200mg/gVSS).

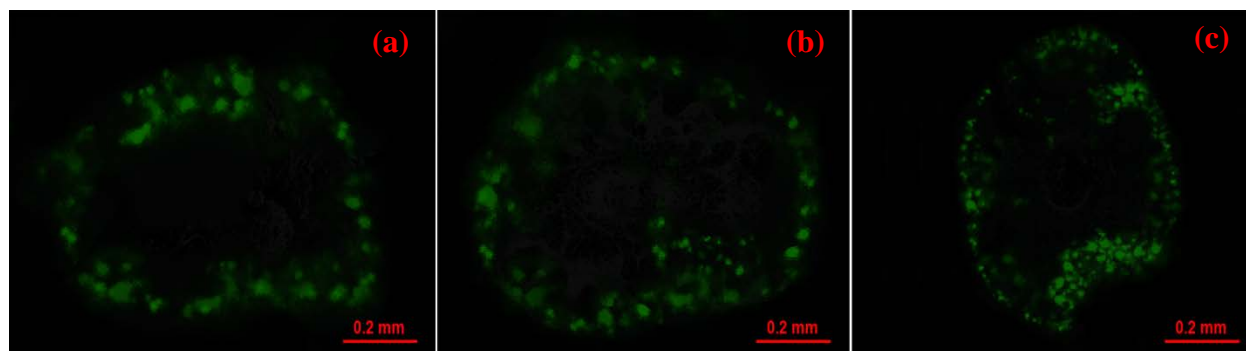

**Figure S5.** Distributions of FITC-labeled TiO<sub>2</sub> (a), ZnO (b) and CuO (c) NPs on AGS cross-section.

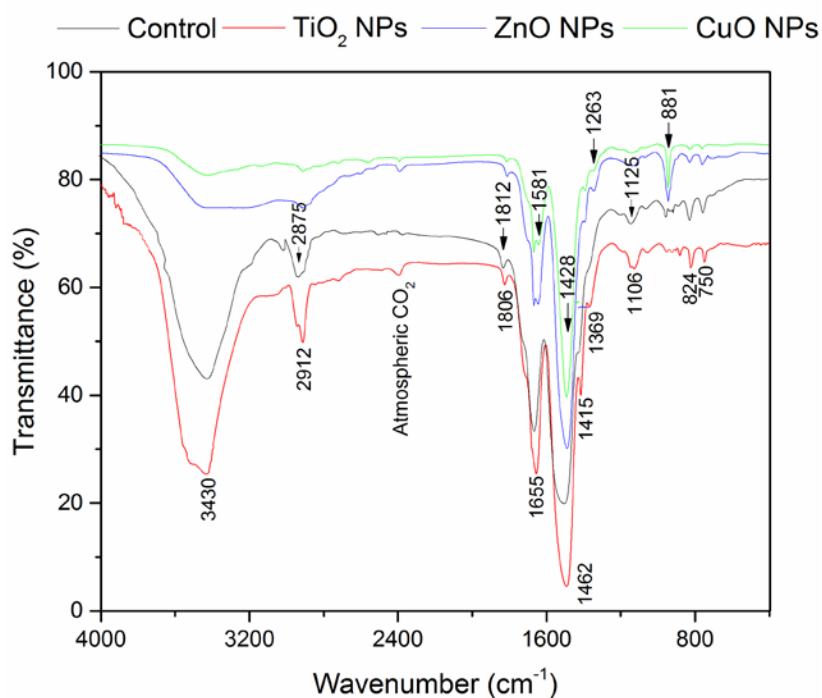

**Figure S6.** FTIR spectra of EPS in the absence and presence of 200 mg/gVSS of TiO<sub>2</sub>, ZnO and CuO NPs. The results of FTIR analysis was shown in **Table S3**.

### S3. Supplemental tables

**Table S1.** Effect of dispersant addition (10mg/L polyacrylamide) on the EPS and methane production under different NPs (200mg/L) exposure.

| NPs types        | EPS production              |                          |        |     |                      |                                      | Methane production     |                     |        |     |                      |                                      |
|------------------|-----------------------------|--------------------------|--------|-----|----------------------|--------------------------------------|------------------------|---------------------|--------|-----|----------------------|--------------------------------------|
|                  | No polyacrylamide (mg/gVSS) | Polyacrylamide (mg/gVSS) | T Test | D F | Prob >  t  (p-value) | Significantly different <sup>2</sup> | No polyacrylamide (mL) | Polyacrylamide (mL) | T Test | D F | Prob >  t  (p-value) | Significantly different <sup>2</sup> |
| Control          | 103.7 ± 4.5                 | 104.2 ± 2.3              | 0.03   | 1   | 0.4                  | NO                                   | 24.4 ± 0.8             | 24.8 ± 0.9          | 0.4    | 1   | 0.4                  | NO                                   |
| TiO <sub>2</sub> | 152.6 ± 6.6                 | 149.2 ± 5.1              | -0.2   | 1   | 0.2                  | NO                                   | 26.3 ± 0.6             | 25.9 ± 0.1          | 0.3    | 1   | 0.7                  | NO                                   |
| ZnO              | 85.4 ± 3.8                  | 92.5 ± 2.1               | -1.1   | 1   | 0.2                  | NO                                   | 14.4 ± 0.3             | 15.2 ± 0.4          | -1.6   | 1   | 0.5                  | NO                                   |
| CuO              | 45.1 ± 1.4                  | 48.9 ± 1.8               | -0.9   | 1   | 0.8                  | NO                                   | 4.4 ± 0.1              | 4.9 ± 0.2           | -0.5   | 1   | 0.5                  | NO                                   |

1 DF: Degrees of freedom.

2 Significance level = 0.05.

**Table S2.** Correlation analysis results of microbial abundance in AGS and individual compositions of EPS.

| NPs type         | Microbial | Correlation analysis results       | EPS composition <sup>a</sup> |                       |        |
|------------------|-----------|------------------------------------|------------------------------|-----------------------|--------|
|                  |           |                                    | Protein                      | Polysaccharides       | DNA    |
| TiO <sub>2</sub> | Bacteria  | Spearman's correlation coefficient | -0.839                       | 0.69                  | 0.033  |
|                  |           | Significance level                 | 0.044                        | 0.063                 | 0.934  |
|                  |           | N                                  | 9                            | 9                     | 9      |
|                  | Archaea   | Spearman's correlation coefficient | 0.646                        | 0.482                 | 0.022  |
|                  |           | Significance level                 | 0.060                        | 0.189                 | 0.956  |
|                  |           | N                                  | 9                            | 9                     | 9      |
| ZnO              | Bacteria  | Spearman's correlation coefficient | -0.412                       | 0.504                 | 0.890  |
|                  |           | Significance level                 | 0.271                        | 0.166                 | 0.001  |
|                  |           | N                                  | 9                            | 9                     | 9      |
|                  | Archaea   | Spearman's correlation coefficient | 0.848                        | -0.470                | -0.517 |
|                  |           | Significance level                 | 0.047                        | 0.202                 | 0.154  |
|                  |           | N                                  | 9                            | 9                     | 9      |
| CuO              | Bacteria  | Spearman's correlation coefficient | -0.761                       | -0.291                | 0.834  |
|                  |           | Significance level                 | 0.026                        | 0.448                 | 0.005  |
|                  |           | N                                  | 9                            | 9                     | 9      |
|                  | Archaea   | Spearman's correlation coefficient | 0.932                        | 0.991                 | -0.724 |
|                  |           | Significance level                 | 2.56×10 <sup>-4</sup>        | 1.96×10 <sup>-7</sup> | 0.027  |
|                  |           | N                                  | 9                            | 9                     | 9      |

<sup>a</sup> All the statistically significant correlations have been highlighted in red.

**Table S3.** Main functional groups of EPS observed in the FT-IR spectra.

| Wave number (cm <sup>-1</sup> ) | Vibration type                      | Functional type              |
|---------------------------------|-------------------------------------|------------------------------|
| 3430                            | -OH and -NH <sub>2</sub> stretching | Polysaccharides and proteins |
| 2875–2912                       | CH <sub>2</sub> stretching          | Aliphatic hydrocarbons       |
| 1806–1812                       | C = O stretching                    | VFAs                         |



|           |                                                  |                          |
|-----------|--------------------------------------------------|--------------------------|
| 1655      | C = O and C-N stretching<br>(amide I)            | Proteins (peptidic bond) |
| 1581      | C-N Stretching and N-H<br>deformation (amide II) | Proteins (peptidic bond) |
| 1415–1462 | C-H bending and C-N<br>stretching (amide III)    | Proteins (peptidic bond) |
| 1369      | C = O stretching                                 | Carboxylic groups        |
| 1263      | C = O deformation                                |                          |
| 1125–1136 | C-O-C stretching                                 | Polysaccharides          |
| <1000     | Fingerprint region                               | Phosphate group          |

---

## References

1. RE, S., Anaerobic biotechnology for industrial wastewater treatment. *Environ Sci Technol* **1983**, *17*, 416A–427A.
2. Gomec, C. Y.; Letsiou, I.; Ozturk, I.; Eroglu, V.; Wilderer, P. A., Identification of Archaeal population in the granular sludge of an UASB reactor treating sewage at low temperatures. *J. Environ. Sci. Health A* **2008**, *43*, 1504–1510.
3. Gu, L.; Li, Q.; Quan, X.; Cen, Y.; Jiang, X., Comparison of nanosilver removal by flocculent and granular sludge and short- and long-term inhibition impacts. *Water Res.* **2014**, *58*, 62–70.
